# Supplementary material for: Effectiveness of an online SUpport PRogramme (SUPR) for older hearing aid users: study protocol for a cluster randomised controlled trial
Source: PubMed Central journal article supplement — BMJ Open. 2017 Jun 20;7(5):e015012. doi: 10.1136/bmjopen-2016-015012 (PMC5541333; doi:10.1136/bmjopen-2016-015012), 2017-06-20
Supplement: bmjopen-2016-015012supp001.pdf [file bmjopen-2016-015012supp001.pdf]

**Table 1 Spirit flow diagram. Schedule of enrolment, interventions, and assessments**

|                       |                                              | Allocation       | Enrolment | Post-Allocation and Enrolment |                  |                   |                   |
|-----------------------|----------------------------------------------|------------------|-----------|-------------------------------|------------------|-------------------|-------------------|
|                       |                                              | of HAD practices |           |                               |                  |                   |                   |
| TIMEPOINT             | Outcome measurements                         | -T2              | -T1       | T0<br>(Baseline)              | T1<br>(6 months) | T2<br>(12 months) | T3<br>(18 months) |
| <b>ENROLMENT:</b>     |                                              |                  |           |                               |                  |                   |                   |
|                       | Eligibility screen                           |                  | x         |                               |                  |                   |                   |
|                       | Informed consent                             |                  | x         |                               |                  |                   |                   |
|                       | Allocation                                   | x                |           |                               |                  |                   |                   |
| <b>INTERVENTIONS:</b> |                                              |                  |           |                               |                  |                   |                   |
|                       | Care as Usual<br>(Hearing aid fitting)       | x                | —————     |                               |                  | x                 |                   |
|                       | Intervention<br>(Hearing aid fitting + SUPR) | x                | —————     |                               |                  | x                 |                   |

|           |              | Allocation       | Enrolment | Post-Allocation and Enrolment |            |             |             |
|-----------|--------------|------------------|-----------|-------------------------------|------------|-------------|-------------|
|           |              | of HAD practices |           |                               |            |             |             |
| TIMEPOINT | Outcome      | -T2              | -T1       | T0                            | T1         | T2          | T3          |
|           | measurements |                  |           | (Baseline)                    | (6 months) | (12 months) | (18 months) |

**ASSESSMENTS:**

*Demographic*

*variables*

Gender

**x**

Age

**x**

Marital status

**x**

Living situation

**x**

Level of  
education

**x**

Occupational  
status

**x**

Country of birth  
participant

**x**

|                                              |                                                                                                         | Allocation       | Enrolment | Post-Allocation and Enrolment |                  |                   |                   |
|----------------------------------------------|---------------------------------------------------------------------------------------------------------|------------------|-----------|-------------------------------|------------------|-------------------|-------------------|
|                                              |                                                                                                         | of HAD practices |           |                               |                  |                   |                   |
| TIMEPOINT                                    | Outcome measurements                                                                                    | -T2              | -T1       | T0<br>(Baseline)              | T1<br>(6 months) | T2<br>(12 months) | T3<br>(18 months) |
| Country of birth<br>participant's<br>parents |                                                                                                         |                  |           | <b>x</b>                      |                  |                   |                   |
| Hearing status                               | Pure tone<br>audiogram                                                                                  |                  |           | <b>x</b>                      |                  |                   |                   |
| <i>Primary outcome measures - HAUs</i>       |                                                                                                         |                  |           |                               |                  |                   |                   |
| The use of<br>communication<br>strategies    | CPHI -<br>Maladaptive<br>Behaviours,<br>Verbal Strategies,<br>and Non-verbal<br>Strategies<br>subscales |                  |           | <b>x</b>                      | <b>x</b>         | <b>x</b>          | <b>x</b>          |
| <i>Secondary outcome measures - HAUs</i>     |                                                                                                         |                  |           |                               |                  |                   |                   |

|                                           |                                                                                 | Allocation       | Enrolment | Post-Allocation and Enrolment |                  |                   |                   |
|-------------------------------------------|---------------------------------------------------------------------------------|------------------|-----------|-------------------------------|------------------|-------------------|-------------------|
|                                           |                                                                                 | of HAD practices |           |                               |                  |                   |                   |
| TIMEPOINT                                 | Outcome measurements                                                            | -T2              | -T1       | T0<br>(Baseline)              | T1<br>(6 months) | T2<br>(12 months) | T3<br>(18 months) |
| Personal adjustment to hearing impairment | CPHI - Self-acceptance, Acceptance of Loss, and Stress and Withdrawal subscales |                  |           | <b>x</b>                      | <b>x</b>         | <b>x</b>          | <b>x</b>          |
| Self-efficacy of hearing aid handling     | -MARS-HA - Basic handling subscale                                              |                  |           | <b>x</b>                      | <b>x</b>         | <b>x</b>          | <b>x</b>          |
|                                           | -MARS-HA - Advanced handling subscale                                           |                  |           |                               | <b>x</b>         | <b>x</b>          | <b>x</b>          |
| Self-reported hearing aid use             | -IOI-HA (item 1)                                                                |                  |           |                               | <b>x</b>         | <b>x</b>          | <b>x</b>          |
|                                           | -Use questionnaire                                                              |                  |           |                               | <b>x</b>         | <b>x</b>          | <b>x</b>          |
| Objective hearing aid use                 | -Data-logging                                                                   |                  |           |                               | <b>x</b>         | <b>x</b>          | <b>x</b>          |

|                                                                   |                                                                                                                            | Allocation       | Enrolment | Post-Allocation and Enrolment |                  |                   |                   |
|-------------------------------------------------------------------|----------------------------------------------------------------------------------------------------------------------------|------------------|-----------|-------------------------------|------------------|-------------------|-------------------|
|                                                                   |                                                                                                                            | of HAD practices |           |                               |                  |                   |                   |
| TIMEPOINT                                                         | Outcome measurements                                                                                                       | -T2              | -T1       | T0<br>(Baseline)              | T1<br>(6 months) | T2<br>(12 months) | T3<br>(18 months) |
| Self-reported intervention outcomes                               | -IOI-HA (items 2-7)/IOI-AI (all 7 items)                                                                                   |                  |           |                               | <b>x</b>         | <b>x</b>          | <b>x</b>          |
| Satisfaction with the hearing aid dispenser service               | “How likely is it that you would recommend the service of the HAD practice to other people (family, friends, colleagues?)” |                  |           | <b>x</b>                      | <b>x</b>         | <b>x</b>          | <b>x</b>          |
| Self-reported activity limitations and participation restrictions | AIADH                                                                                                                      |                  |           | <b>x</b>                      | <b>x</b>         | <b>x</b>          | <b>x</b>          |

|                                                        |                                                       | Allocation       | Enrolment | Post-Allocation and Enrolment |            |             |             |
|--------------------------------------------------------|-------------------------------------------------------|------------------|-----------|-------------------------------|------------|-------------|-------------|
|                                                        |                                                       | of HAD practices |           |                               |            |             |             |
| TIMEPOINT                                              | Outcome                                               | -T2              | -T1       | T0                            | T1         | T2          | T3          |
|                                                        | measurements                                          |                  |           | (Baseline)                    | (6 months) | (12 months) | (18 months) |
| Readiness to do something about one's hearing problems | -URICA - Precontemplation/Contemplation/Action stages |                  |           | <b>x</b>                      | <b>x</b>   | <b>x</b>    | <b>x</b>    |
|                                                        | -URICA - Maintenance stage                            |                  |           |                               | <b>x</b>   | <b>x</b>    | <b>x</b>    |
| Emotional response                                     | HHDI - Emotional response subscale                    |                  |           | <b>x</b>                      | <b>x</b>   | <b>x</b>    | <b>x</b>    |
| <i>Secondary outcome measures - CP</i>                 |                                                       |                  |           |                               |            |             |             |
| Third-party disability                                 | SOS-HEAR                                              |                  |           | <b>x</b>                      | <b>x</b>   | <b>x</b>    | <b>x</b>    |
| Self-reported                                          | IOI-HA-SO/IOI-                                        |                  |           |                               | <b>x</b>   | <b>x</b>    | <b>x</b>    |

intervention      AI-SO

outcomes from

the perspective

of the CP

Abbreviations: HAD practice: hearing aid dispensing practice, SUPR: Support PRogramme, HAU: hearing aid user, CPHI: Communication Profile for the Hearing Impaired, MARS-HA: Measure of Audiologic Rehabilitation Self-Efficacy for Hearing Aids, IOI-HA: International Outcome Inventory - Hearing Aids, IOI-AI: International Outcome Inventory - Alternative Interventions, AIADH: Amsterdam Inventory for Auditory Disability and Handicap, URICA: University of Rhode Island Change Assessment - for Hearing health behaviour, HHDI: Hearing Handicap and Disability Inventory, CP: Communication Partner, SOS-HEAR: Significant Other Scale for Hearing Disability, IOI-HA-SO: International Outcome Inventory Significant Other - Hearing Aids, IOI-AI-SO: International Outcome Inventory Significant Other - Alternative Interventions.
